# Supplementary material for: Differentiating Hepatocellular Carcinoma from Hepatitis C Using Metabolite Profiling
Source: Metabolites. 2012 Oct 10;2(4):701–16. doi: 10.3390/metabo2040701 (PMC3901236; doi:10.3390/metabo2040701)
Supplement: Supplementary File 1 — PDF-Document (PDF, 762 KB) [file metabolites-02-00701-s001.pdf]

## Supplemental Information

**Figure S1.** Loadings plot along LV1 for OSC-PLS analysis of the whole CPMG spectral data.

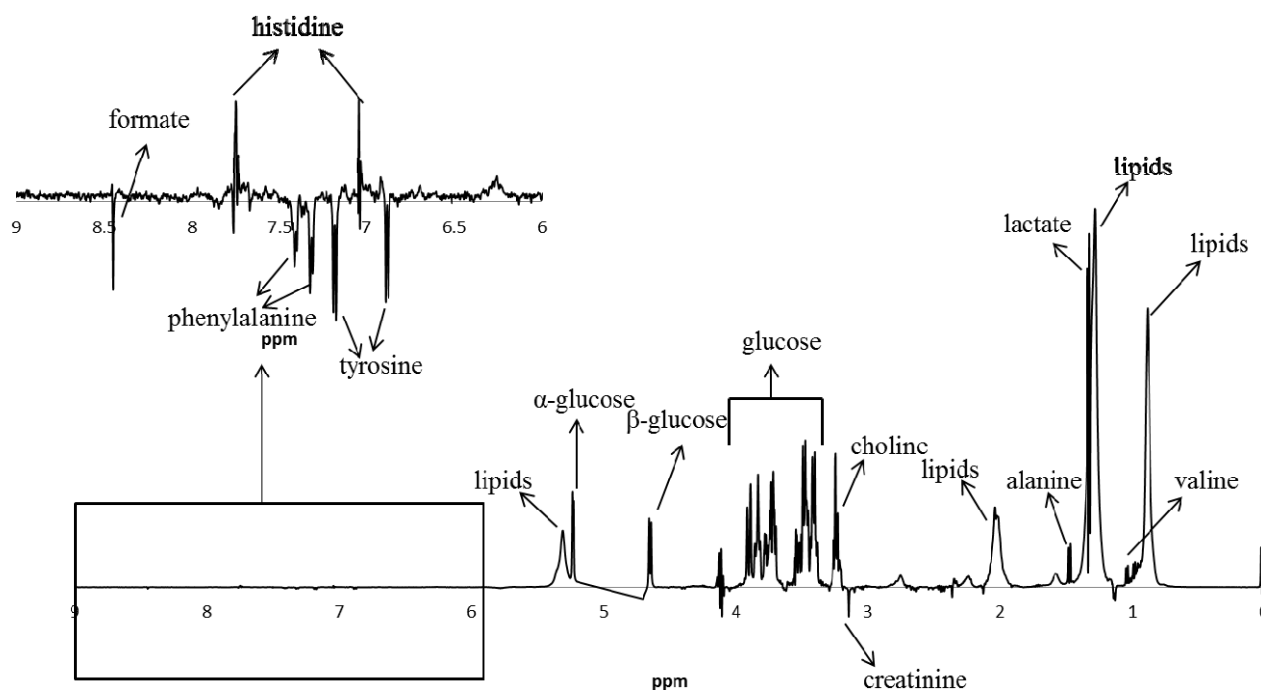

**Figure S2.** Loadings plot along LV1 for OSC-PLS analysis of the whole NOESY spectral data.

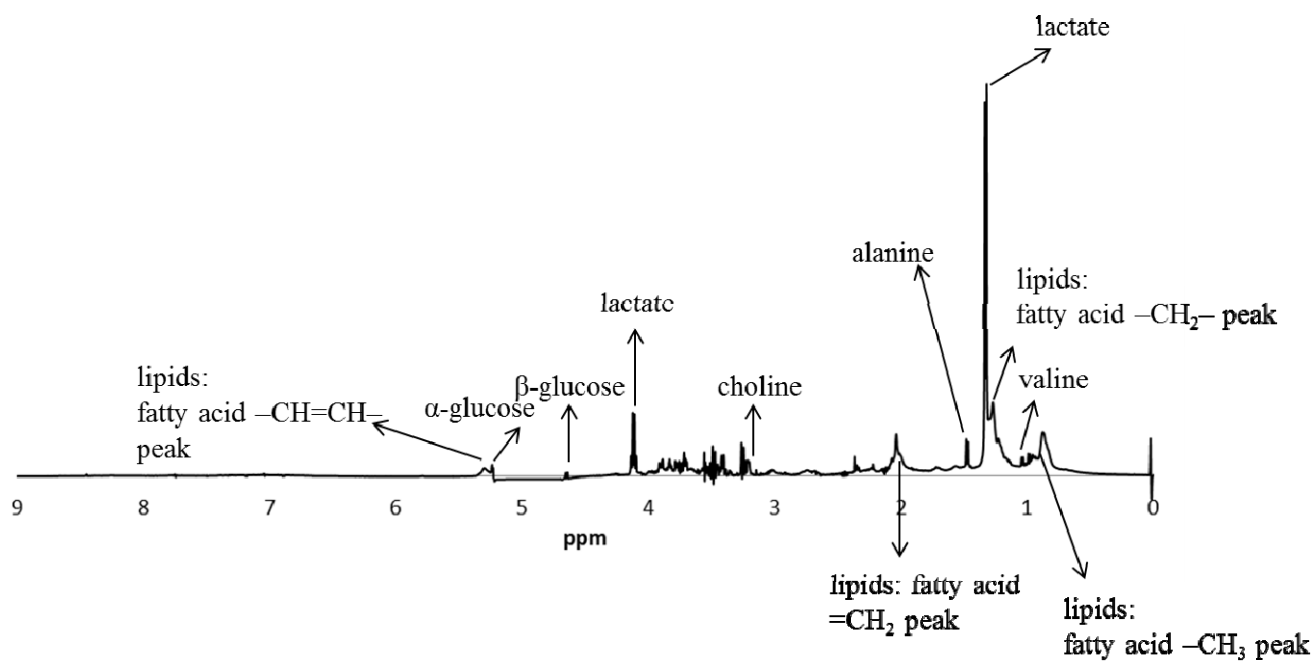

**Figure S3.** PCA analysis based on 19 identified metabolites in the spectra of the HCC and HCV samples. (A) Score plot. (B) Loading on PC2.

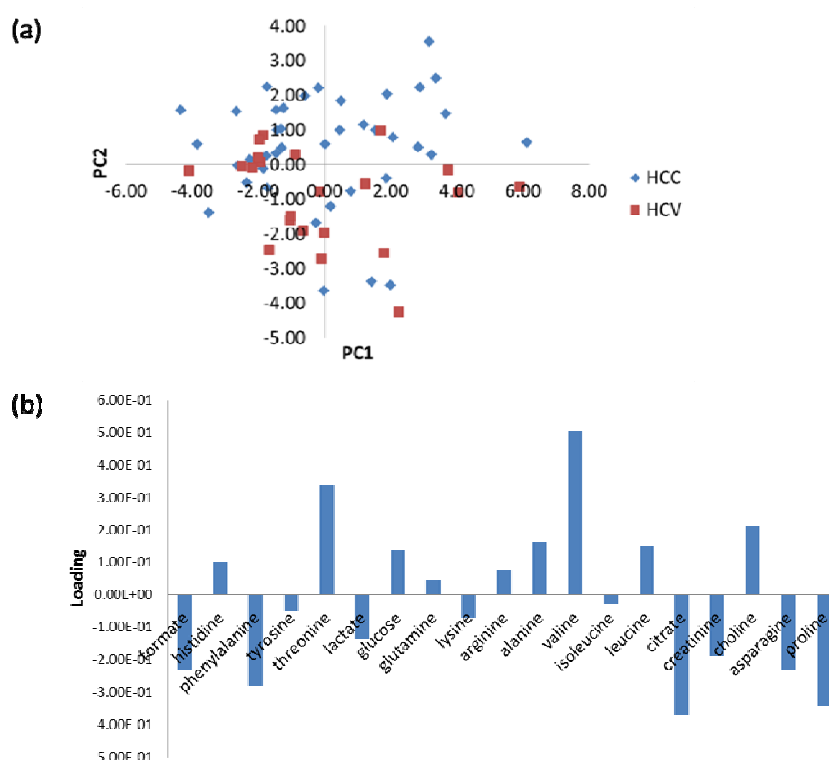

**Figure S4.** PLS-DA model based on 19 identified metabolites in the spectra of the HCC and HCV samples. (A) Cross-validation predicted class values. (B) ROC curve for the prediction result, with AUC of 0.71.

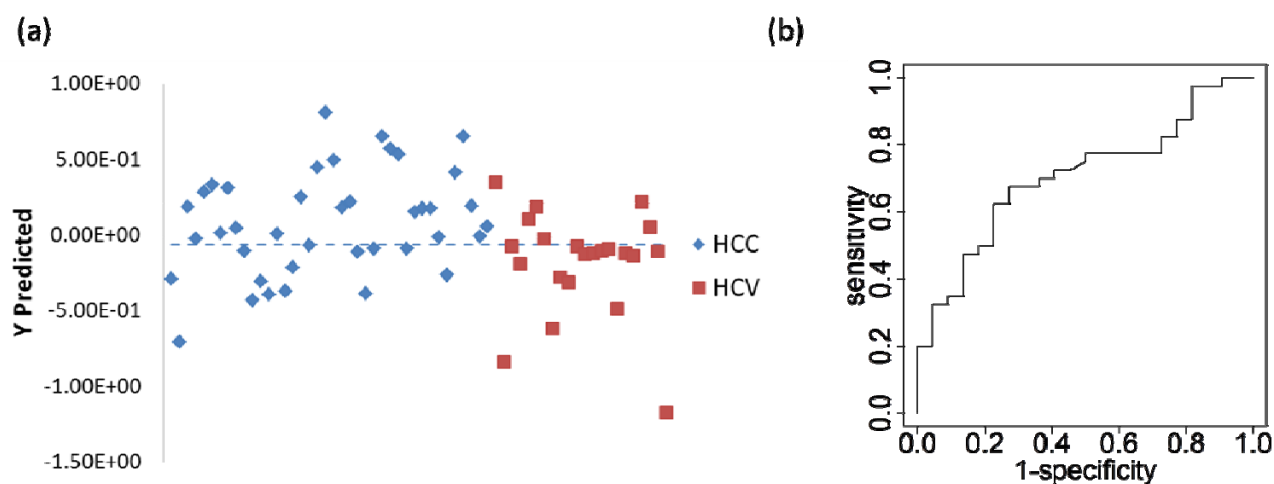

**Figure S5.** Results of the MCCV results (200 iterations) shown in ROC space for PLS-DA models based on the 19 metabolites used to discriminate HCC from HCV. Each blue diamond represents an iteration of the true model; each red square represents an iteration of the permutation model.

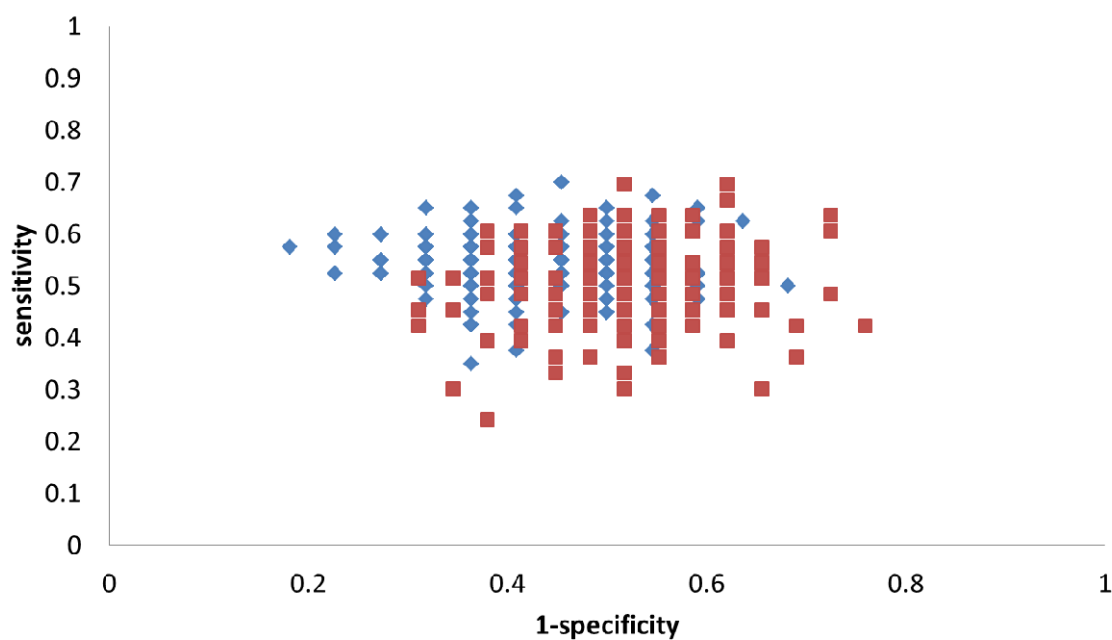

**Figure S6.** Plot of loadings of 19 metabolites for PLS-DA.

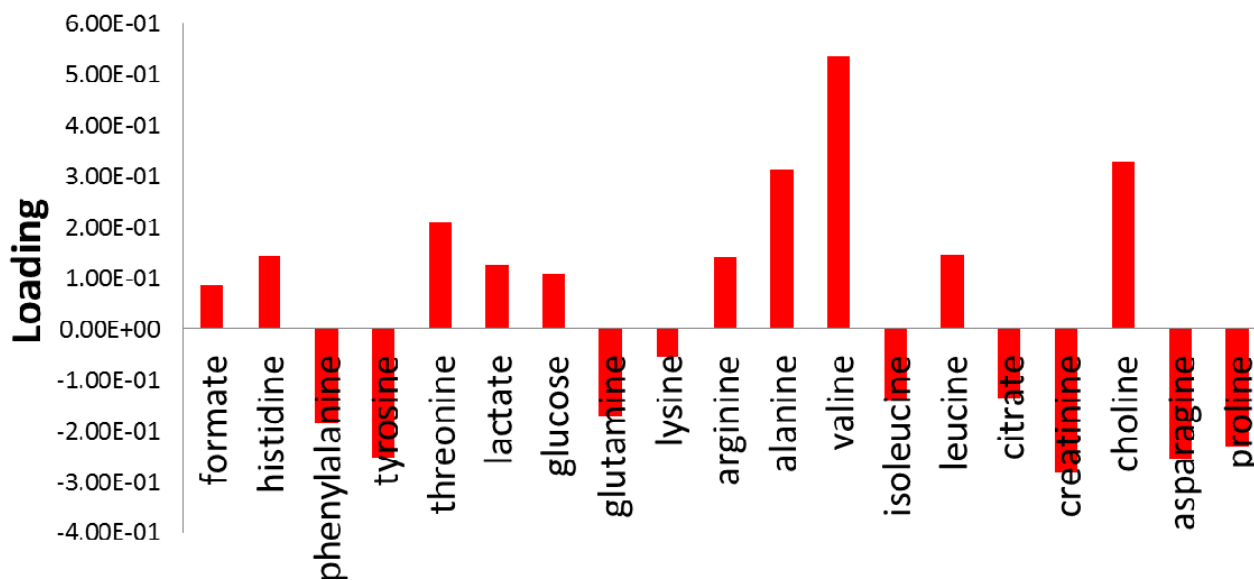

**Figure S7.** PCA analysis based on 3 potential biomarkers in the spectra of the HCC and HCV samples. (A) Score plot. (B) Loading on PC1.

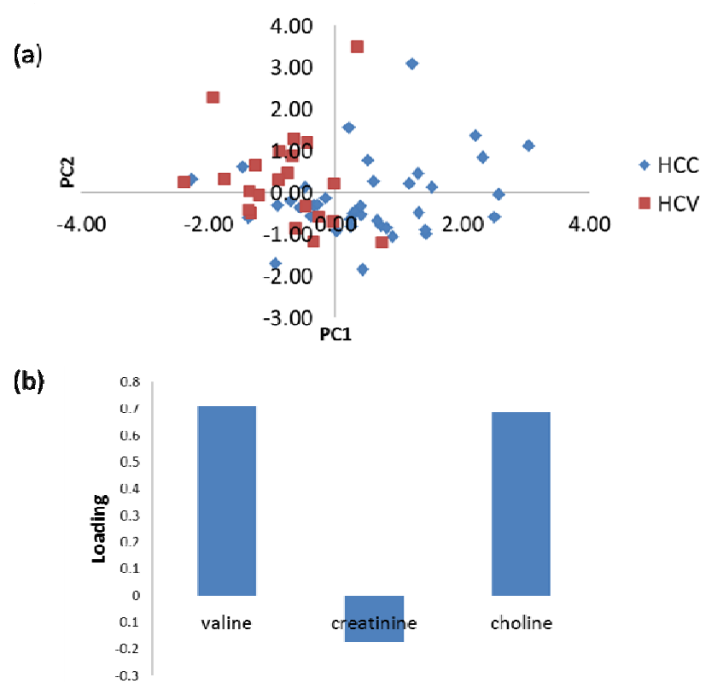

**Figure S8.** Box-plots for creatinine in the HCC and HCV groups for both male and female patients.

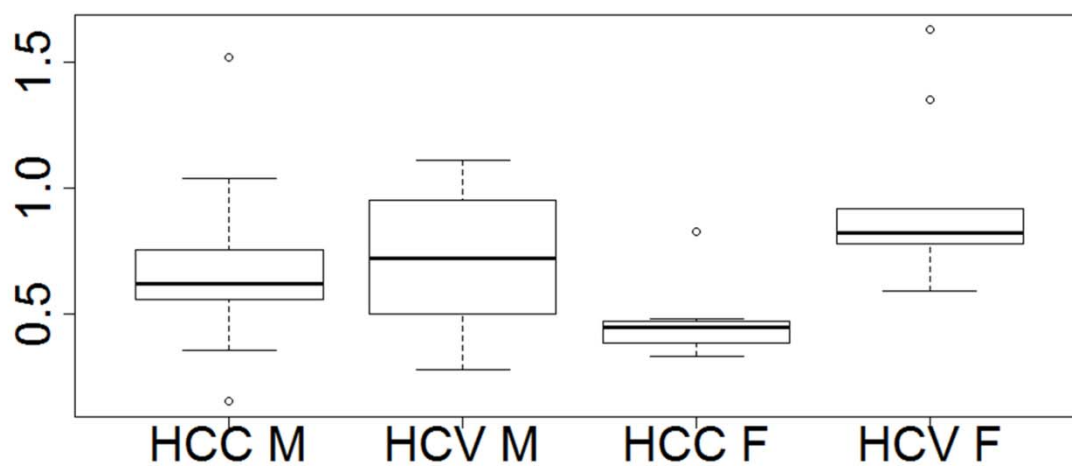

**Table S1.** Assignments of 19 metabolites.

| Metabolite    | Chemical shift (ppm) | multiplicity |
|---------------|----------------------|--------------|
| formate       | 8.44                 | s            |
| histidine     | 7.05                 | d            |
| phenylalanine | 7.36                 | m            |
| tyrosine      | 6.94                 | m            |
| threonine     | 4.25                 | m            |
| lactate       | 4.1                  | q            |
| glucose       | 5.23                 | d            |
| glutamine     | 2.45                 | m            |
| lysine        | 1.89                 | m            |
| arginine      | 1.68                 | m            |
| alanine       | 1.48                 | d            |
| valine        | 1.03                 | d            |
| isoleucine    | 0.92                 | t            |
| leucine       | 0.94                 | t            |
| citrate       | 2.53                 | d            |
| creatinine    | 3.03                 | s            |
| choline       | 3.2                  | d            |
| asparagine    | 2.94                 | m            |
| proline       | 4.08                 | dd           |

**Table S2.** Confusion matrix calculated from PLS-DA using 19 serum metabolites for the HCC (n=40) and HCV (n=22) patients using 200 MCCV iterations. The numbers in parentheses are the results from permutation analysis.

| True class | Total number of samples | Predicted class |             |
|------------|-------------------------|-----------------|-------------|
|            |                         | HCC             | HCV         |
| HCC        | 8000 (8000)             | 4345 (4027)     | 3565 (3973) |
| HCV        | 4400 (4400)             | 1865 (2280)     | 2535 (2120) |

**Table S3.** P-values of male vs female in the two different sample cohorts for the three biomarkers.

| Metabolite | p-value in HCC (Male vs Female) | p-value in HCV (Male vs Female) |
|------------|---------------------------------|---------------------------------|
| Choline    | 0.53                            | 0.41                            |
| Valine     | 0.55                            | 0.06                            |
| Creatinine | 0.06                            | 0.12                            |

**Table S4.** P-values for HCC vs HCV in both male and female patient populations for three biomarkers.

| Metabolite | p-value in male (HCC vs HCV) | p-value in female (HCC vs HCV) |
|------------|------------------------------|--------------------------------|
| Choline    | 0.03                         | 0.05                           |
| Valine     | 0.002                        | 0.0007                         |
| Creatinine | 0.5                          | 0.003                          |
